# Supplementary material
Source: Springer Nature journal article supplement (https://www.springermedizin.de/resource/supplementary/12939_2013_395_MOESM2_ESM.pdf/9551052)

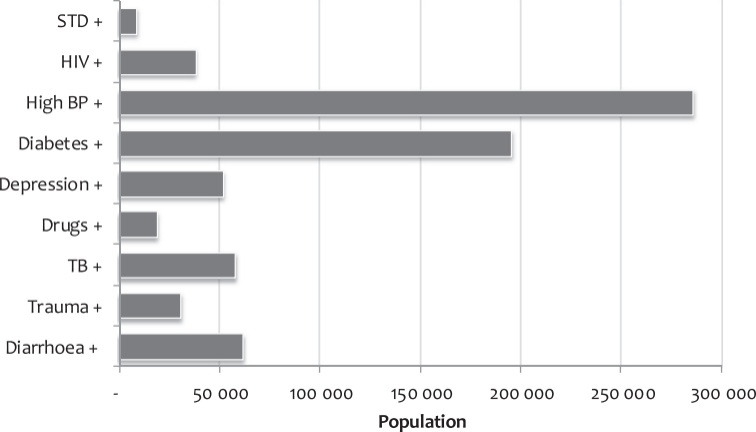

Supplement: MOESM2 [file 9551052]
